# Supplementary material
Source: PubMed Central journal article supplement (PMC5468100)
Supplement: NIHMS788526-supplement-Appendix.pdf [file NIHMS788526-supplement-Appendix.pdf]

**Appendix 1: Changes in Insurance Status and Perforated Appendix Rates for Policy-eligible and Policy-ineligible Young Adults, Before and After the Dependent Coverage Provision. Sensitivity Analyses on Reduced Samples.**

|                                                                                         | Policy Eligible Group <sup>1</sup> |              | Comparison Group |              | Unadjusted difference in change between groups <sup>3</sup> | Adjusted difference in change between groups <sup>4</sup> | p value for between group difference |
|-----------------------------------------------------------------------------------------|------------------------------------|--------------|------------------|--------------|-------------------------------------------------------------|-----------------------------------------------------------|--------------------------------------|
|                                                                                         | Before Policy <sup>2</sup>         | After Policy | Before Policy    | After Policy |                                                             |                                                           |                                      |
| <b>Ages 22-25 vs Ages 26-29, Years 2006-10 vs 2011-12</b>                               |                                    |              |                  |              |                                                             |                                                           |                                      |
| Sample (patient encounters)                                                             | 20,556                             | 18,967       | 7,890            | 7,142        | --                                                          | --                                                        | --                                   |
| Private Insurance                                                                       | 51.8%                              | 53.1%        | 57.1%            | 50.9%        | 7.5%                                                        | 6.8%                                                      | <0.001***                            |
| Uninsured                                                                               | 23.9%                              | 21.7%        | 20.1%            | 21.8%        | -3.9%                                                       | -3.3%                                                     | <0.001***                            |
| Perforated Appendix Rate                                                                | 17.3%                              | 18.1%        | 16.9%            | 18.7%        | -1.0%                                                       | -1.2%                                                     | 0.156                                |
| <b>Ages 19-25 vs Ages 26-34, Years 2009-10 vs 2011-12</b>                               |                                    |              |                  |              |                                                             |                                                           |                                      |
| Sample (patient encounters)                                                             | 11,834                             | 13,192       | 14,637           | 15,959       |                                                             |                                                           |                                      |
| Private Insurance                                                                       | 50.6%                              | 53.7%        | 56.3%            | 53.9%        | 5.5%                                                        | 5.5%                                                      | <0.001***                            |
| Uninsured                                                                               | 22.7%                              | 20.1%        | 19.8%            | 20.0%        | -2.8%                                                       | -3.3%                                                     | <0.001***                            |
| Perforated Appendix Rate                                                                | 17.6%                              | 17.8%        | 18.3%            | 19.9%        | -1.4%                                                       | -1.5%                                                     | 0.047*                               |
| <b>Ages 19-25 vs Ages 26-34, Years 2006-10 vs 2011-12, Unweighted model<sup>5</sup></b> |                                    |              |                  |              |                                                             |                                                           |                                      |
| Sample (patient encounters)                                                             | 37,479                             | 42,477       | 14,637           | 15,959       | --                                                          | --                                                        | --                                   |
| Private Insurance                                                                       | 53.1%                              | 53.8%        | 59.1%            | 54.1%        | 5.7%                                                        | 5.8%                                                      | <0.001***                            |
| Uninsured                                                                               | 22.6%                              | 20.0%        | 18.7%            | 19.9%        | -3.8%                                                       | -3.7%                                                     | <0.001***                            |
| Perforated Appendix Rate                                                                | 17.6%                              | 17.8%        | 18.5%            | 19.8%        | -1.1%                                                       | -1.5%                                                     | 0.010*                               |

**SOURCE:** National Inpatient Sample (NIS), 2006-2012. **NOTE:** 1. Policy Eligible Group defined as policy eligible young adults (ages 19-25 or 22-25), control group is similar policy ineligible young adults (ages 26-34 or 26-34); 2. Before Policy is years 2006 to Q2 of 2010 or 2009 to Q2 of 2010, After policy is years 2011-2012; Q3 and Q4 of 2010 are used as a washout year as the policy began in September 2010; 3. Calculated by subtracting the pre/post difference of the treatment group from the pre/post difference of the control group; 4. Adjusted for sample variation in year, patient-factors (age, sex, race, comorbidities, community income, urban/rural status), and facility-factors (census region and teaching status); 5. Unweighted model incorporated the NIS-based weighting variables (hospital, NIS\_stratum, and discharge weight) into the regression model to serve as a specification text to ensure results are driven by the 2012 NIS reweighting. \* p<0.05, \*\* p<0.01, \*\*\* p<0.001
